# Supplementary material for: Water soluble stimuli-responsive star copolymers with multiple encapsulation and release properties
Source: Royal Society of Chemistry journal article supplement (doi:10.1039/c5ra26144a), 2016-01-01
Supplement: c5ra26144a1.pdf [file c5ra26144a1.pdf]

**Supplementary Materials of the Manuscript**

**Water Soluble Stimuli-responsive Star Copolymers with Multiple  
Encapsulation and Release Properties**

Sandip Das, Dhruva P. Chatterjee,<sup>†</sup> Radhakanta Ghosh, Pradip Das<sup>‡</sup> and Arun K. Nandi\*

Polymer Science Unit, Indian Association for the Cultivation of Science, Jadavpur, Kolkata-  
700 032, INDIA

---

\*For correspondence: Arun K. Nandi, Email: [psuakn@iacs.res.in](mailto:psuakn@iacs.res.in)

<sup>†</sup> Dept. of Chemistry, Presidency University, Kolkata-700 073

<sup>‡</sup> Centre for Advanced Materials, IACS, Jadavpur, Kolkata-700 032

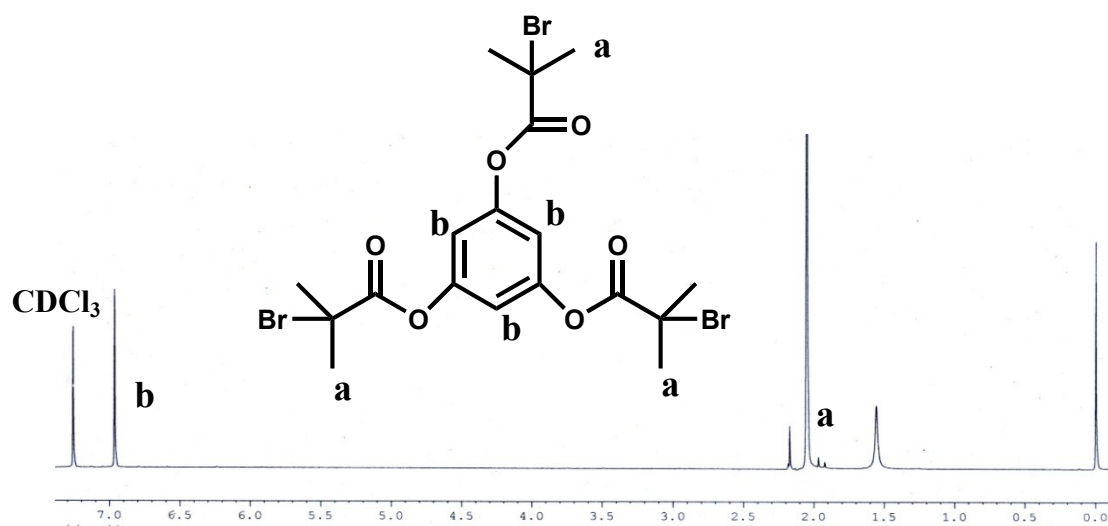

**Fig. S1** <sup>1</sup>H NMR spectrum of 3-arm star initiator (TIBB) in CDCl<sub>3</sub> along with their peak assignments.

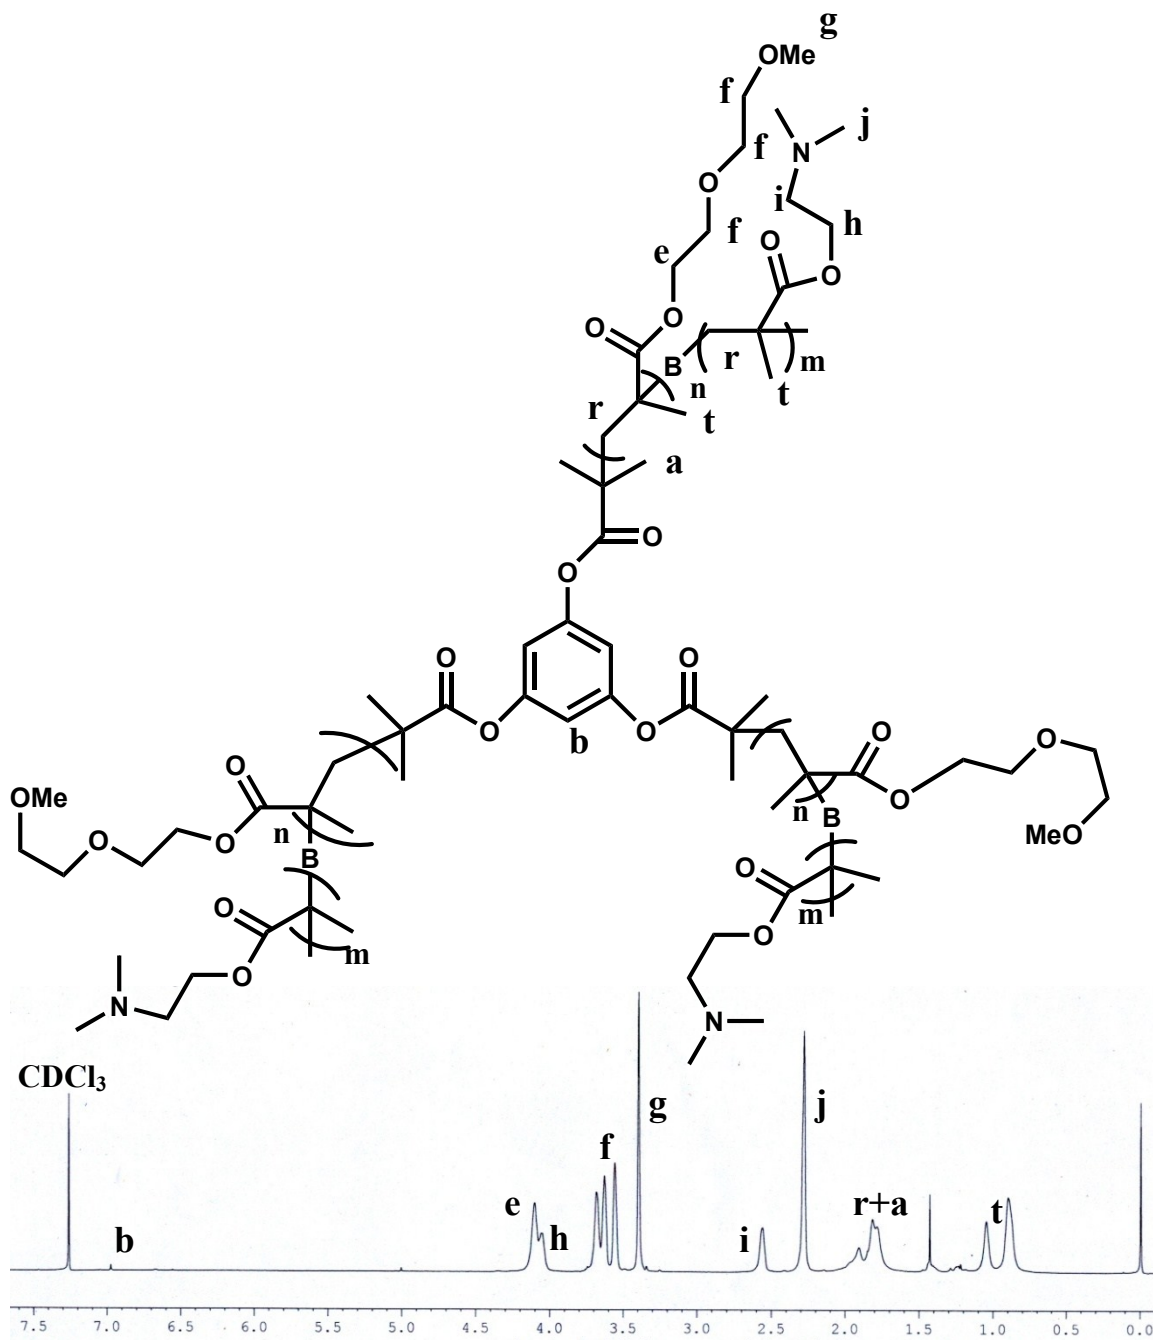

**Fig. S2**  $^1\text{H}$  NMR spectrum of 3-arm block copolymer ( $\text{P}_1$ ) in  $\text{CDCl}_3$  along with their peak assignments (here B means block copolymer)

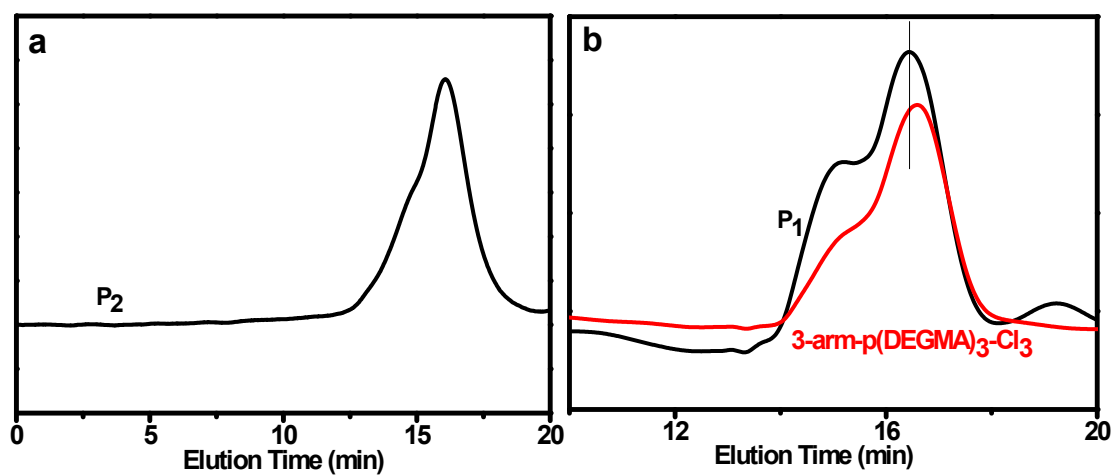

**Fig. S3** GPC traces of (a) 3-arm-p(DEGMA<sub>33</sub>-*R*-DMAEMA<sub>23</sub>) ( $P_2$ ) copolymer (b) 3-arm-p(DEGMA)<sub>3</sub>-Cl<sub>3</sub> macro-initiator and 3-arm-p(DEGMA<sub>34</sub>-*B*-DMAEMA<sub>21</sub>) ( $P_1$ ) copolymer in DMF

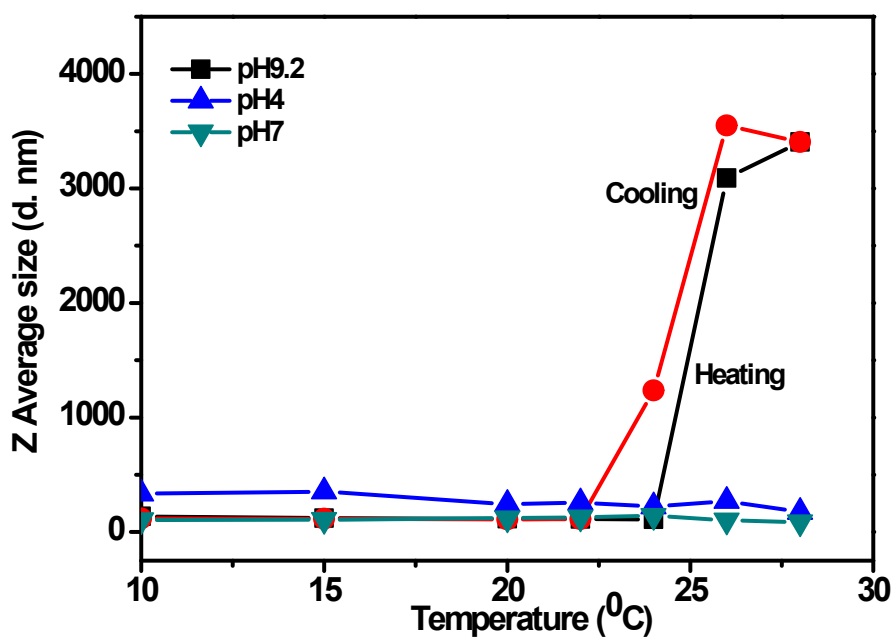

Fig. S4 Z average size vs. temperature plot of  $P_1$  block copolymer containing  $17 \mu\text{M}$  ANS at different pH obtained from DLS study in aqueous solution (0.4% w/v).

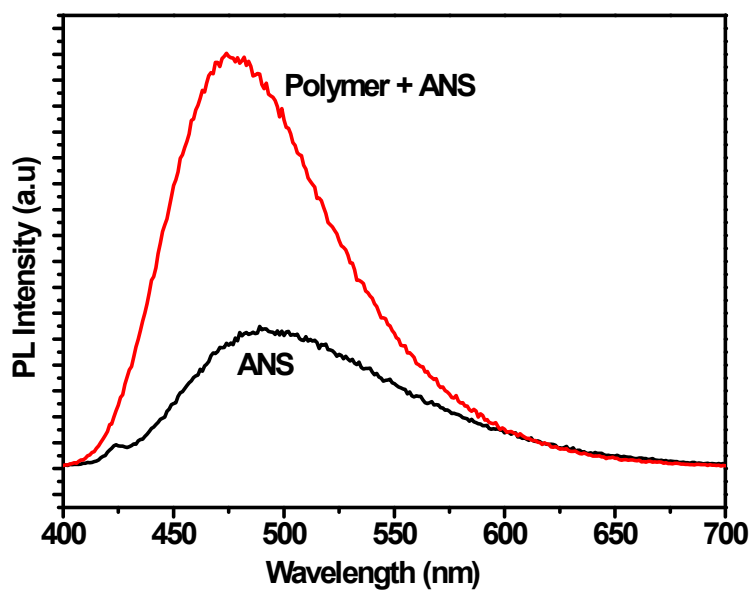

**Fig. S5** PL intensity vs wavelength plot of pure ANS in aqueous medium and ANS in presence  $P_3$  copolymer solution (0.4 % w/v).

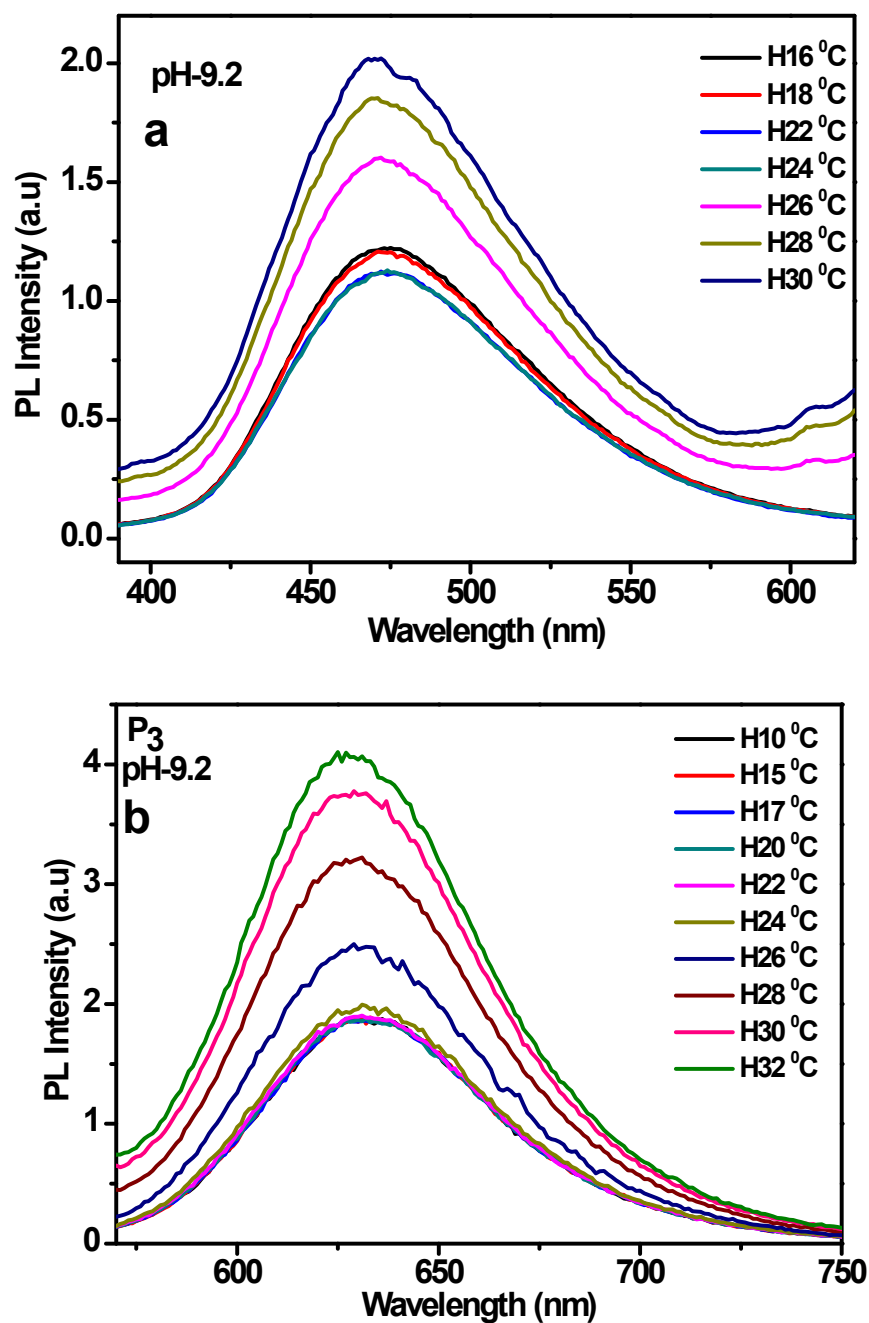

**Fig. S6** (a) PL intensity vs wavelength plot of  $P_2$  copolymer solution (0.4 % w/v) containing 17  $\mu\text{M}$  ANS with increasing temperature at pH-9.2. (b) PL intensity vs wavelength plot of  $P_3$  copolymer solution (0.4 % w/v) containing 17  $\mu\text{M}$  Nile red with increasing temperature at pH-9.2.

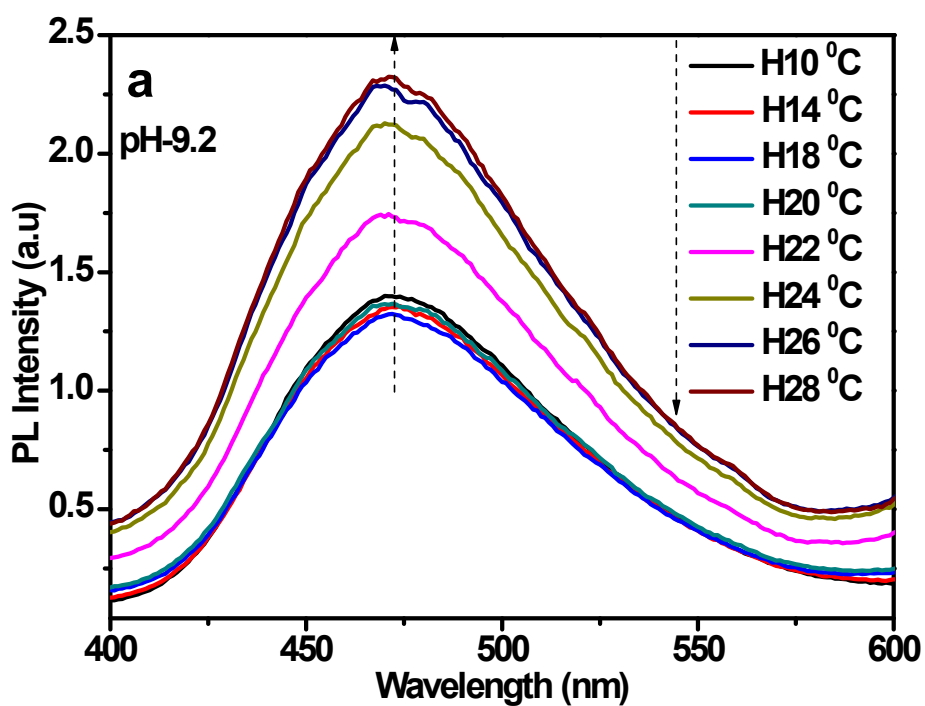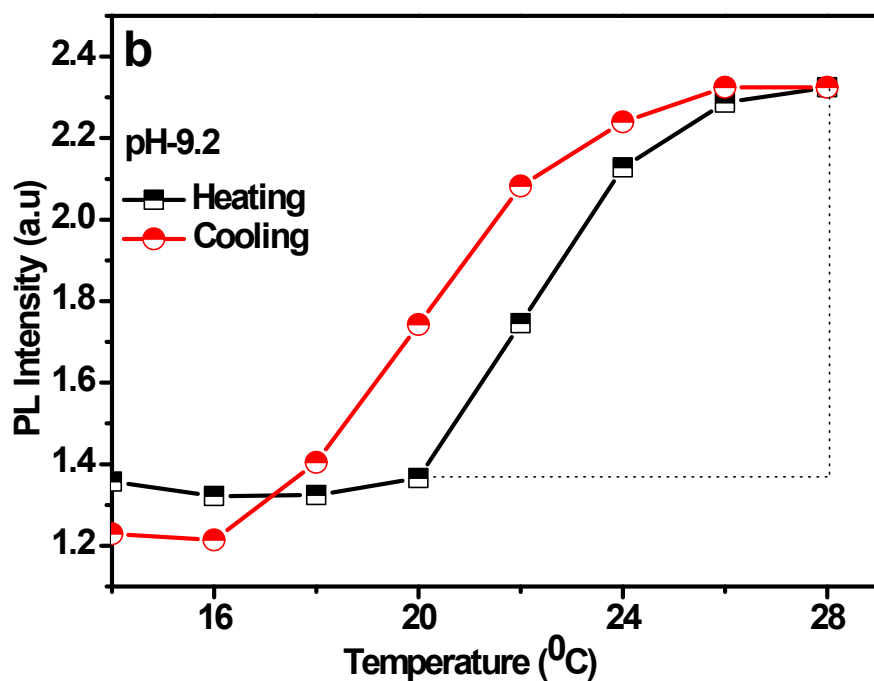

**Fig. S7** (a) PL-Intensity vs wavelength plot of  $P_1$  copolymer solution (0.4 % w/v) with increasing temperature at pH-9.2. (b) Intensity vs temperature plot of  $P_1$  copolymer solution (0.4 % w/v) at pH-9.2 with increasing temperature.



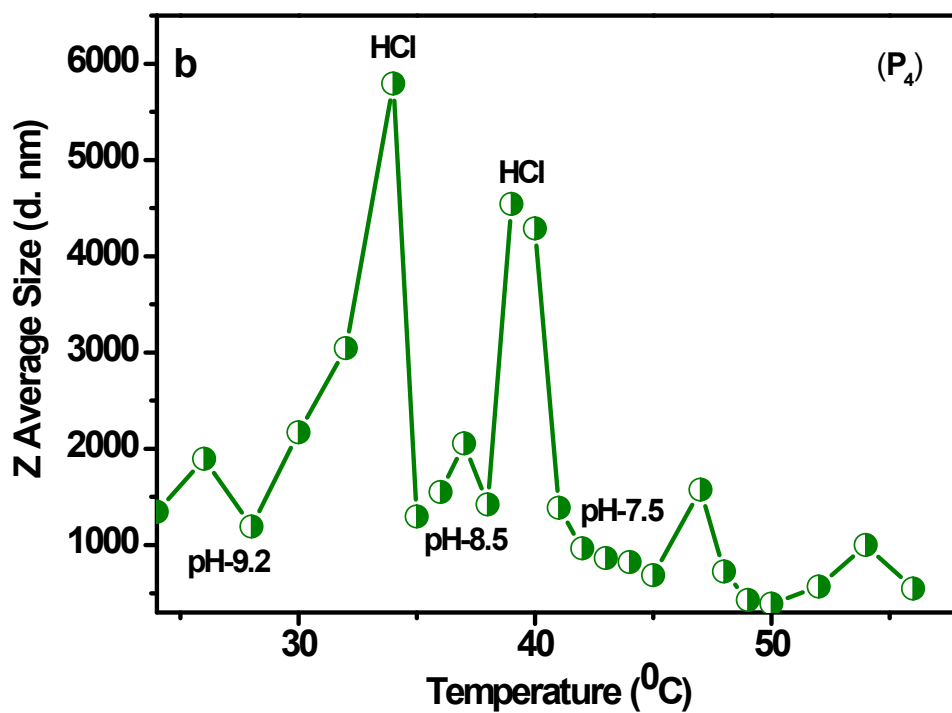

Fig. S8 Z average size vs temperature plot of aqueous solution P<sub>4</sub> copolymer with variation of pH

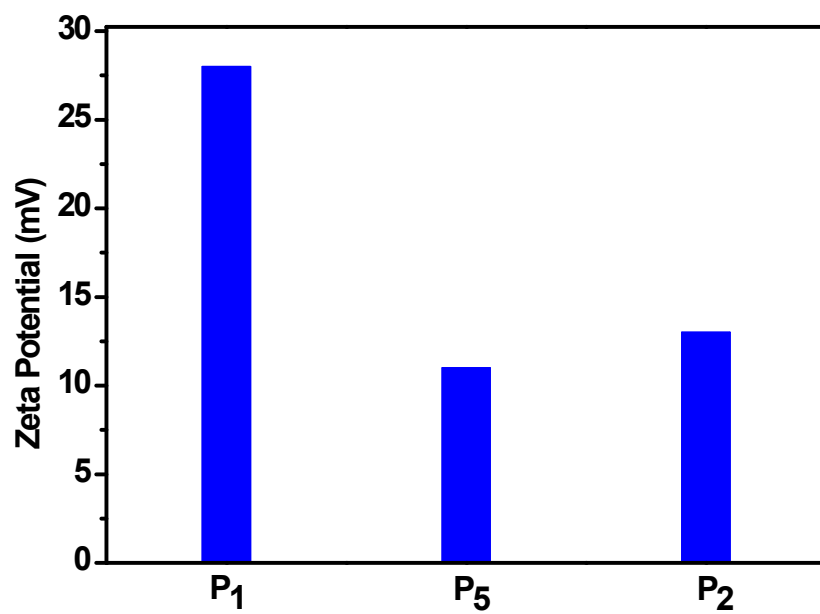

**Fig. S9** The bar diagram of zeta potential values arising from the surface charge of **P<sub>1</sub>**, **P<sub>2</sub>** and **P<sub>5</sub>** copolymers
